# Supplementary material for: A multistimulus-responsive self-healable supramolecular copper(ii)-metallogel derived from l-(+) tartaric acid: an efficient Schottky barrier diode
Source: Royal Society of Chemistry journal article supplement (doi:10.1039/d2nj03086a), 2022-01-01
Supplement: d2nj03086a1.pdf [file d2nj03086a1.pdf]

## *Electronic Supplementary Information†*

# **Multistimuli-Responsive Self-Healable Supramolecular Copper(II)-Metallogel Derived from L-(+) Tartaric Acid: An efficient Schottky barrier diode†**

Subhendu Dhibar,<sup>a,‡</sup> Saurav Kumar Ojha,<sup>b,‡</sup> Aiswarya Mohan,<sup>c</sup> Siva Prasad Chimminiankuttichi Prabhakaran,<sup>c</sup> Subham Bhattacharjee,<sup>d</sup> Kripasindhu Karmakar,<sup>a</sup> Priya Karmakar,<sup>a</sup> Padmanabhan Predeep,<sup>\*c</sup> Animesh Kumar Ojha,<sup>\*b</sup> and Bidyut Saha<sup>\*a</sup>

<sup>a</sup>Department of Chemistry, The University of Burdwan, Golapbag, Burdwan-713104, West Bengal, India, \*E-mail: bsaha@chem.buruniv.ac.in, Tel: +91-9476341691 (B. Saha).

<sup>b</sup>Department of Physics, Motilal Nehru National Institute of Technology Allahabad, Prayagraj-211004, India, \*E-mail: animesh@mnnit.ac.in, Tel: +91-9532830699 (A. K. Ojha).

<sup>c</sup>Laboratory for Molecular Photonics and Electronics, Department of Physics, National Institute of Technology Calicut, Kozhikode-673603, Kerala, India, \*E-mail: predeep@nitc.ac.in, Tel: +91 9495329035 (P. Predeep).

<sup>d</sup>Department of Chemistry, Kazi Nazrul University, Asansol-713303, West Bengal, India.

‡SD and SKO should be treated as joint first authors.

**Table S1.** Molar ratios of Copper acetate (CuA) : Tartaric acid for gelation in DMF

| <b>Entry</b> | <b>Copper Acetate : Tartaric Acid (mM)</b> | <b>Total Vol</b> | <b>Phase<sup>a</sup></b> | <b>Picture</b>                                                                        |
|--------------|--------------------------------------------|------------------|--------------------------|---------------------------------------------------------------------------------------|
| 1.           | 0.5:0.5                                    | 1ml              | S                        |    |
| 2.           | 0.5:1.0                                    | 1ml              | PG                       |    |
| 3.           | 1.0:0.5                                    | 1ml              | S                        |    |
| 4.           | 1.0:1.0                                    | 1ml              | PG                       |    |
| 5.           | 1.0:1.5                                    | 1ml              | PG                       |   |
| 6.           | 1.0:2.0                                    | 1ml              | G                        |  |

<sup>a</sup>G: gel; PG: partial gel; S: sol.

**Table S2.** Effect of the copper salts with different counter-anions on the gelation ability of CuA-Tar metallogel system<sup>a</sup>

| Entry | Metal Salt                                                                                                                                | [Metal Salt] | [Ligand]                                                                                   | Vol <sup>b</sup> | Phase | Picture                                                                               |
|-------|-------------------------------------------------------------------------------------------------------------------------------------------|--------------|--------------------------------------------------------------------------------------------|------------------|-------|---------------------------------------------------------------------------------------|
| 1.    | <br>CuCl <sub>2</sub> ·2H <sub>2</sub> O                 | 1 mM         | <br>2mM   | 1mL              | S     |    |
| 2.    | <br>Cu(NO <sub>3</sub> ) <sub>2</sub> ·3H <sub>2</sub> O | 1 mM         | <br>2mM   | 1mL              | S     |    |
| 3.    | <br>CuSO <sub>4</sub> ·5H <sub>2</sub> O                 | 1 mM         | <br>2mM   | 1mL              | S     |    |
| 4.    | <br>Cu(OH) <sub>2</sub>                                 | 1 mM         | <br>2mM  | 1mL              | P     |   |
| 5.    | <br>CuCl <sub>2</sub>                                  | 1 mM         | <br>2mM | 1mL              | S     |  |

Abbreviations: S, solution; P, precipitates. <sup>a</sup>Gelation tests were performed as described in the Experimental Section. <sup>b</sup>Total volume of solvent.

### Gelation ability Procedure of CuA-Tar metallogel in different solvents:

The gelation ability procedure of Copper(II) acetate monohydrate and tartaric acid, was tested in different solvents maintaining the minimum critical gel concentration of CuA-Tar metallogel from the synthetic method of CuA-Tar metallogel, described in the experimental section.<sup>a</sup> The gel formation strategy of CuA-Tar metallogel in different solvents were checked by ‘inversion of the vial’ test. The experimental result (Table S3) clearly revealed that the Copper(II) acetate monohydrate and tartaric acid based mechanically stable CuA-Tar metallogel can exclusively form in DMF solvent medium (Fig. 1).

**Table S3.** Gelation process of CuA-Tar metallogel<sup>a</sup> with  $\text{Cu}(\text{CH}_3\text{COO})_2 \cdot \text{H}_2\text{O}$  in various solvents<sup>b</sup>

| Entry | Solvent <sup>b</sup>                                                                              | Phase | Conc. <sup>c</sup> | Vol. <sup>d</sup> | Gelation Time <sup>e</sup> | Gel-Phase Colour <sup>f</sup> | Picture                                                                               |
|-------|---------------------------------------------------------------------------------------------------|-------|--------------------|-------------------|----------------------------|-------------------------------|---------------------------------------------------------------------------------------|
| 1.    | <br>Xylene       | I     | 500                | 1                 | -                          | -                             |    |
| 2.    | <br>MSO        | S     | 500                | 1                 | 15min                      | Blue                          |  |
| 3.    | <br>1-Propanol | I     | 1200               | 1                 | -                          | -                             |  |
| 4.    | <br>n-Octanol  | I     | 500                | 1                 | -                          | -                             |  |
| 5.    | <br>acetone    | S     | 500                | 1                 | 15min                      | Blue                          |  |
| 6.    | <br>MeOH       | S     | 500                | 1                 | 15min                      | Blue                          |  |

|    |                                                                                                         |   |     |   |       |      |                                                                                     |
|----|---------------------------------------------------------------------------------------------------------|---|-----|---|-------|------|-------------------------------------------------------------------------------------|
| 7. | <br>CH <sub>3</sub> CN | P | 500 | 1 | 15min | Blue |  |
| 8. | <br>C<br>cyclohexane   | I | 500 | 1 | -     | -    |  |

<sup>a</sup>Gelation tests were performed as discussed in the Experimental Section: Cu(OAc)<sub>2</sub>·H<sub>2</sub>O (0.199 g, 1 mmol) in DMF (500 μl) and tartaric acid (0.300 g, 2 mmol) in DMF (500 μl). The temperature of the ultrasonic bath was 30 ± 2 during the sonication. <sup>b</sup>Solvent abbreviations: CH<sub>3</sub>CN = Acetonitrile, DMSO = Dimethyl sulfoxide, MeOH = Methanol. <sup>c</sup>Minimum Gelation Concentration (MGC) of CuA-Tar metallogel is 500 mg mL<sup>-1</sup>. <sup>d</sup>Total volume of the solvents. <sup>e</sup>All gels were completely opaque. <sup>f</sup>Abbreviations: S = Solution; I = insoluble; P = precipitate.

**Table S4.** Gelation process of CuA-Tar metallogel<sup>a</sup> with Cu(NO<sub>3</sub>)<sub>2</sub>·3H<sub>2</sub>O in various solvents<sup>b</sup>

| Entry | Solvent <sup>b</sup>                                                                               | Phase | Conc. <sup>c</sup> | Vol. <sup>d</sup> | Gelation Time <sup>e</sup> | Gel-Phase Colour <sup>f</sup> | Picture                                                                               |
|-------|----------------------------------------------------------------------------------------------------|-------|--------------------|-------------------|----------------------------|-------------------------------|---------------------------------------------------------------------------------------|
| 1.    | <br>Xylene       | I     | 500                | 1                 | -                          | -                             |   |
| 2.    | <br>D<br>MSO    | S     | 500                | 1                 | 15min                      | Blue                          |  |
| 3.    | <br>1-Propanol  | I     | 1200               | 1                 | -                          | -                             |  |
| 4.    | <br>n-Octanol   | I     | 500                | 1                 | -                          | -                             |  |
| 5.    | <br>A<br>cetone | S     | 500                | 1                 | 15min                      | Blue                          |  |
| 6.    | <br>MeOH        | S     | 500                | 1                 | 15min                      | Blue                          |  |

|    |                                                                                                             |   |     |   |       |      |                                                                                     |
|----|-------------------------------------------------------------------------------------------------------------|---|-----|---|-------|------|-------------------------------------------------------------------------------------|
| 7. | 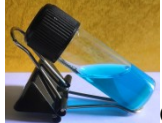<br>C<br>H <sub>3</sub> CN | S | 500 | 1 | 15min | Blue |  |
| 8. | <br>C<br>cyclohexane       | I | 500 | 1 | -     | -    |  |

<sup>a</sup>Gelation tests were performed as discussed in the Experimental Section: Cu(NO<sub>3</sub>)<sub>2</sub>·3H<sub>2</sub>O (0.241 g, 1 mmol) in DMF (500 μl) and tartaric acid (0.300 g, 2 mmol) in DMF (500 μl). The temperature of the ultrasonic bath was 30 ± 2 during the sonication.

<sup>b</sup>Solvent abbreviations: CH<sub>3</sub>CN = Acetonitrile, DMSO = Dimethyl sulfoxide, MeOH = Methanol. <sup>c</sup>Minimum Gelation Concentration (MGC) of CuA-Tar metallo gel is 500 mg mL<sup>-1</sup>. <sup>d</sup>Total volume of the solvents. <sup>e</sup>All gels were completely opaque. <sup>f</sup>Abbreviations: S = Solution; I = insoluble; P = precipitate.

**Table S5.** Gelation process of CuA-Tar metallo gel<sup>a</sup> with CuCl<sub>2</sub>·2H<sub>2</sub>O in various solvents<sup>b</sup>

| Entry | Solvent <sup>b</sup>                                                                                   | Phase | Conc. <sup>c</sup> | Vol. <sup>d</sup> | Gelation Time <sup>e</sup> | Gel-Phase Colour <sup>f</sup> | Picture                                                                               |
|-------|--------------------------------------------------------------------------------------------------------|-------|--------------------|-------------------|----------------------------|-------------------------------|---------------------------------------------------------------------------------------|
| 1.    | <br>D<br>Xylene       | I     | 500                | 1                 | -                          | -                             |    |
| 2.    | <br>D<br>MSO        | S     | 500                | 1                 | 15min                      | Blue                          |  |
| 3.    | <br>A<br>1-Propanol | I     | 1200               | 1                 | -                          | -                             |  |
| 4.    | <br>A<br>n-Octanol  | I     | 500                | 1                 | -                          | -                             |  |
| 5.    | <br>A<br>cetone     | S     | 500                | 1                 | 15min                      | Blue                          |  |
| 6.    | <br>A<br>MeOH       | S     | 500                | 1                 | 15min                      | Blue                          |  |

|    |                                                                                                         |   |     |   |       |      |                                                                                     |
|----|---------------------------------------------------------------------------------------------------------|---|-----|---|-------|------|-------------------------------------------------------------------------------------|
| 7. | <br>CH <sub>3</sub> CN | P | 500 | 1 | 15min | Blue |  |
| 8. | <br>Cyclohexane        | S | 500 | 1 | 15min | Blue |  |

<sup>a</sup>Gelation tests were performed as discussed in the Experimental Section: CuCl<sub>2</sub>·2H<sub>2</sub>O (~0.171 g, 1 mmol) in DMF (500 μl) and tartaric acid (0.300 g, 2 mmol) in DMF (500 μl). The temperature of the ultrasonic bath was 30 ± 2 during the sonication. <sup>b</sup>Solvent abbreviations: CH<sub>3</sub>CN = Acetonitrile, DMSO = Dimethyl sulfoxide, MeOH = Methanol. <sup>c</sup>Minimum Gelation Concentration (MGC) of CuA-Tar metallogel is 500 mg mL<sup>-1</sup>. <sup>d</sup>Total volume of the solvents. <sup>e</sup>All gels were completely opaque. <sup>f</sup>Abbreviations: S = Solution; I = insoluble; P = precipitate.

**Table S6.** Gelation process of CuA-Tar metallogel<sup>a</sup> with CuSO<sub>4</sub>·5H<sub>2</sub>O in various solvents<sup>b</sup>

| Entry | Solvent <sup>b</sup>                                                                              | Phase | Conc. <sup>c</sup> | Vol. <sup>d</sup> | Gelation Time <sup>e</sup> | Gel-Phase Colour <sup>f</sup> | Picture                                                                               |
|-------|---------------------------------------------------------------------------------------------------|-------|--------------------|-------------------|----------------------------|-------------------------------|---------------------------------------------------------------------------------------|
| 1.    | <br>Xylene      | I     | 500                | 1                 | -                          | -                             |   |
| 2.    | <br>MSO        | S     | 500                | 1                 | 15min                      | Blue                          |  |
| 3.    | <br>1-Propanol | I     | 1200               | 1                 | -                          | -                             |  |
| 4.    | <br>n-Octanol  | I     | 500                | 1                 | -                          | -                             |  |
| 5.    | <br>cetone     | S     | 500                | 1                 | 15min                      | Blue                          |  |
| 6.    | <br>MeOH       | S     | 500                | 1                 | 15min                      | Blue                          |  |

|    |                                                                                                         |   |     |   |       |      |                                                                                     |
|----|---------------------------------------------------------------------------------------------------------|---|-----|---|-------|------|-------------------------------------------------------------------------------------|
| 7. | <br>CH <sub>3</sub> CN | P | 500 | 1 | 15min | Blue |  |
| 8. | <br>cyclohexane        | S | 500 | 1 | 15min | Blue |  |

<sup>a</sup>Gelation tests were performed as discussed in the Experimental Section: CuSO<sub>4</sub>·5H<sub>2</sub>O (0.159 g, 1 mmol) in DMF (500 μl) and tartaric acid (0.300 g, 2 mmol) in DMF (500 μl). The temperature of the ultrasonic bath was 30 ± 2 during the sonication.  
<sup>b</sup>Solvent abbreviations: CH<sub>3</sub>CN = Acetonitrile, DMSO = Dimethyl sulfoxide, MeOH = Methanol. <sup>c</sup>Minimum Gelation Concentration (MGC) of CuA-Tar metallogel is 500 mg mL<sup>-1</sup>. <sup>d</sup>Total volume of the solvents. <sup>e</sup>All gels were completely opaque.  
<sup>f</sup>Abbreviations: S = Solution; I = insoluble; P = precipitate.

**Table S7.** Gelation process of CuA-Tar metallogel<sup>a</sup> with Cu(OH)<sub>2</sub> in various solvents<sup>b</sup>

| Entry | Solvent <sup>b</sup>                                                                              | Phase | Conc. <sup>c</sup> | Vol. <sup>d</sup> | Gelation Time <sup>e</sup> | Gel-Phase Colour <sup>f</sup> | Picture                                                                               |
|-------|---------------------------------------------------------------------------------------------------|-------|--------------------|-------------------|----------------------------|-------------------------------|---------------------------------------------------------------------------------------|
| 1.    | <br>Xylene      | I     | 500                | 1                 | -                          | -                             |   |
| 2.    | <br>MSO        | S     | 500                | 1                 | 15min                      | Blue                          |  |
| 3.    | <br>1-Propanol | I     | 1200               | 1                 | -                          | -                             |  |
| 4.    | <br>n-Octanol  | I     | 500                | 1                 | -                          | -                             |  |
| 5.    | <br>acetone    | I     | 500                | 1                 | -                          | -                             |  |
| 6.    | <br>MeOH       | I     | 500                | 1                 | -                          | -                             |  |



|    |                                                                                                         |   |     |   |       |      |                                                                                     |
|----|---------------------------------------------------------------------------------------------------------|---|-----|---|-------|------|-------------------------------------------------------------------------------------|
| 7. | <br>CH <sub>3</sub> CN | P | 500 | 1 | 15min | Blue |  |
| 8. | <br>C<br>cyclohexane   | I | 500 | 1 | -     | -    |  |

<sup>a</sup>Gelation tests were performed as discussed in the Experimental Section: Cu(OH)<sub>2</sub> (0.097g, 1 mmol) in DMF (500 μl) and tartaric acid (0.300 g, 2 mmol) in DMF (500 μl). The temperature of the ultrasonic bath was 30 ± 2 during the sonication. <sup>b</sup>Solvent abbreviations: CH<sub>3</sub>CN = Acetonitrile, DMSO = Dimethyl sulfoxide, MeOH = Methanol. <sup>c</sup>Minimum Gelation Concentration (MGC) of CuA-Tar metallogel is 500 mg mL<sup>-1</sup>. <sup>d</sup>Total volume of the solvents. <sup>e</sup>All gels were completely opaque. <sup>f</sup>Abbreviations: S = Solution; I = insoluble; P = precipitate.

### pH dependent CuA-Tar metallogel formation strategy

pH dependent CuA-Tar metallogel formation strategy with DMF solution of Cu(OAc)<sub>2</sub>·H<sub>2</sub>O salt and Tartaric acid clearly shows that the CuA-Tar metallogel is formed at pH = 3.90. The variation of pH is maintained by Cu(OAc)<sub>2</sub>·H<sub>2</sub>O and Tartaric acid and it also supports minimum critical gelation concentration (MGC) where it is clearly show that the CuA-Tar metallogel only formed with 500 mg mL<sup>-1</sup> of Cu(OAc)<sub>2</sub>·H<sub>2</sub>O salt and Tartaric acid (where, [Cu(CH<sub>3</sub>COO)<sub>2</sub>·H<sub>2</sub>O]:[ tartaric acid] = 1:2, (w/w)).

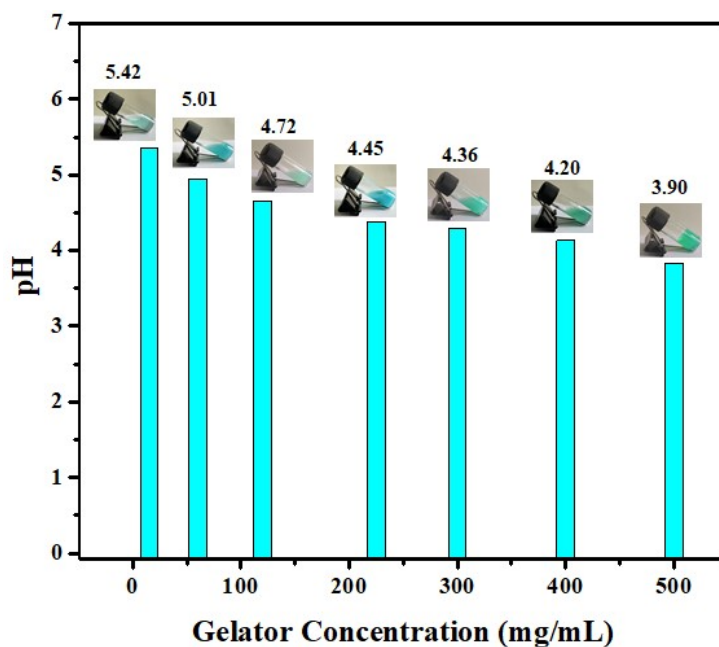

**Fig. S1.** pH dependent CuA-Tar metallogel formation strategy with DMF solution of Cu(OAc)<sub>2</sub>·H<sub>2</sub>O salt and Tartaric acid.
